# Supplementary material for: Gata4 is critical to maintain gut barrier function and mucosal integrity following epithelial injury
Source: PubMed Central journal article supplement (PMC5101531; doi:10.1038/srep36776), 2016-11-09
Supplement: srep36776-s1.pdf [file srep36776-s1.pdf]

## Supplementary information

### **Gata4 is critical to maintain gut barrier function and mucosal integrity following epithelial injury**

David Lepage, Élise Bélanger, Christine Jones, Sarah Tremblay, Joannie Allaire, Joannie Bruneau, Claude Asselin, Nathalie Perreault, Alfredo Menendez, Fernand-Pierre Gendron and Francois Boudreau

#### Supplementary Figure legends

**Figure S1. Indomethacin does not affect jejunum epithelial cell proliferation in Gata4 mutant mice.** PCNA positive cells were detected by immunofluorescence on the jejunum of control **(a)** and *Gata4*<sup>ΔIEC</sup> **(b)** mice that were sacrificed 24 h after indomethacin injection. Original magnification: 2.5X. **(c)** The ratio of PCNA-positive cells was expressed in percentage of total number of crypt cells and was averaged from 8 individual crypts of a total of 3 different mice per group.

**Figure S2. Transcriptomic analysis predicts increased epithelial cell death in the jejunum of Gata4 mutant mice following indomethacin treatment.** Total RNA was isolated from the jejunum of control and *Gata4*<sup>ΔIEC</sup> mice that were sacrificed after indomethacin injection (n=3 per group) and probes for hybridization with Illumina BeadChips were generated. Genes were then filtered for up- or down-regulation of expression of a minimum of 2.0-fold with a *P* value ≤ 0.05 and gene signature datasets were analyzed by the Ingenuity Pathway Analysis tool. **(a)** Categories and functions annotations were associated with a p-value, activation state and number of different

molecules found to be modulated in these categories. **(b)** 26 molecules were found to be modulated (up in red and down in green) and associated with predicted increases of epithelial cell death. The color quantification scale of dotted lines associated with biological functions covers between orange (increased state) and blue (decreased state).

**Figure S3. Transcriptomic analysis predicts decreased immune cell trafficking in the**

**jejunum of *Gata4* mutant mice following indomethacin treatment.** Total RNA was isolated from the jejunum of control and *Gata4*<sup>ΔIEC</sup> mice that were sacrificed after indomethacin injection (n=3 per group) and probes for hybridization with Illumina BeadChips were generated. Genes were then filtered for up- or down-regulation of expression of a minimum of 2.0-fold with a *P* value ≤ 0.05 and gene signature datasets were analyzed by the Ingenuity Pathway Analysis tool.

**(a)** Categories and functions annotations were associated with a p-value, activation state and number of different molecules found to be modulated in these categories. **(b)** 34 molecules were found to be modulated (up in red and down in green) and associated with predicted decreases of immune cell trafficking. The color quantification scale of dotted lines associated with biological functions covers between orange (increased state) and blue (decreased state).

**Figure S4. ZO-1 localization remains unchanged in the jejunum of *Gata4* mutant mice.**

Immunofluorescence detection of ZO-1 on jejunum sections prepared from controls and *Gata4*<sup>ΔIEC</sup> mice. Original magnification: 10X.

**a**

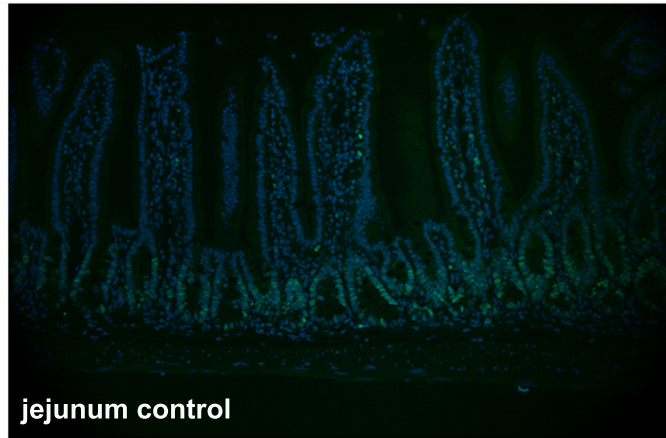

**b**

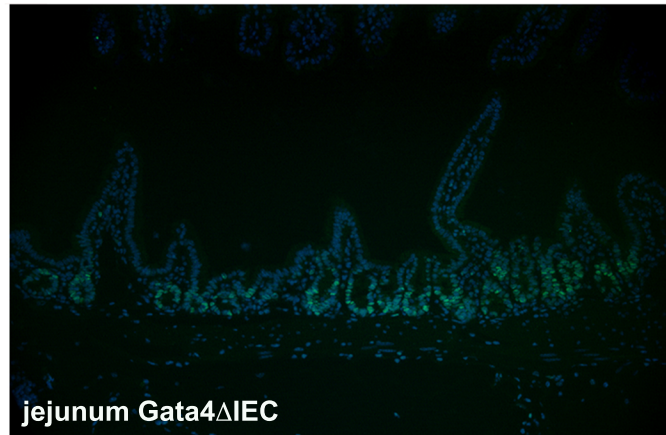

**c**

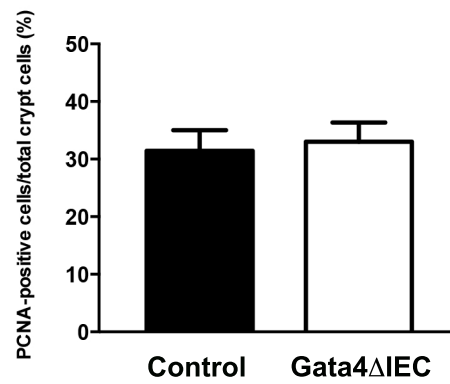

**Figure S1. Lepage et al.**

**A**

| Categories                                                                    | Diseases or Functions Annotation        | p-Value  | Predicted Activation State | Activation z-score | # Molecules |
|-------------------------------------------------------------------------------|-----------------------------------------|----------|----------------------------|--------------------|-------------|
| Cell Death and Survival                                                       | necrosis                                | 1,86E-07 |                            | 1,664              | 93          |
| Cell Death and Survival, Gastrointestinal Disease, Hepatic System Disease     | cell death of hepatocytes               | 5,66E-07 | Increased                  | 2,251              | 14          |
| Cell Death and Survival                                                       | cell death                              | 7,76E-07 |                            | 1,479              | 111         |
| Cell Death and Survival, Gastrointestinal Disease, Hepatic System Disease     | cell death of liver cells               | 2,68E-06 |                            | 1,691              | 15          |
| Cell Death and Survival, Respiratory Disease                                  | apoptosis of lung cells                 | 6,61E-06 |                            | 0,896              | 7           |
| Cell Death and Survival                                                       | cell death of epithelial cells          | 7,60E-06 | Increased                  | 2,233              | 26          |
| Cell Death and Survival, Gastrointestinal Disease, Hepatic System Disease     | necrosis of liver                       | 1,06E-05 |                            | 1,488              | 16          |
| Cell Death and Survival                                                       | necrosis of epithelial tissue           | 3,00E-05 |                            | 1,954              | 28          |
| Cell Death and Survival                                                       | apoptosis                               | 3,14E-05 |                            | 1,594              | 86          |
| Cell Death and Survival, Gastrointestinal Disease, Hepatic System Disease     | apoptosis of hepatocytes                | 9,71E-05 |                            | 1,659              | 10          |
| Cell Death and Survival, Gastrointestinal Disease, Hepatic System Disease     | apoptosis of liver cells                | 9,74E-05 |                            | 1,052              | 11          |
| Cell Death and Survival                                                       | cell death of enteroendocrine cells     | 1,44E-04 |                            |                    | 3           |
| Cell Death and Survival                                                       | necrosis of kidney                      | 2,41E-04 |                            | 1,497              | 18          |
| Cell Death and Survival                                                       | apoptosis of connective tissue cells    | 3,04E-04 |                            | 0,375              | 15          |
| Cell Death and Survival                                                       | apoptosis of epithelial cells           | 3,57E-04 |                            | 1,392              | 15          |
| Cell Death and Survival                                                       | cell death of kidney cells              | 3,96E-04 |                            | 1,332              | 17          |
| Cell Death and Survival, Respiratory Disease                                  | cell death of pneumocytes               | 4,04E-04 |                            | 1,982              | 4           |
| Cell Death and Survival                                                       | cell death of tumor cell lines          | 6,02E-04 |                            | 1,561              | 51          |
| Cell Death and Survival                                                       | cell death of splenocytes               | 6,51E-04 |                            | 0,447              | 5           |
| Cell Death and Survival, Cellular Compromise, Reproductive System Development | cytotoxicity of gonadal cell lines      | 7,89E-04 |                            |                    | 2           |
| Cell Death and Survival, Respiratory Disease                                  | quantity of apoptotic pneumocytes       | 7,89E-04 |                            |                    | 2           |
| Cell Death and Survival                                                       | cell death of colon                     | 1,09E-03 |                            |                    | 3           |
| Cell Death and Survival                                                       | apoptosis of tumor cell lines           | 1,16E-03 |                            | 1,702              | 41          |
| Cell Death and Survival                                                       | cell death of striatal neurons          | 1,31E-03 |                            | 0,468              | 5           |
| Cell Death and Survival, Embryonic Development                                | apoptosis of embryonic cell lines       | 1,32E-03 | Increased                  | 2,043              | 10          |
| Cell Death and Survival, Embryonic Development                                | cell death of embryonic cell lines      | 1,49E-03 |                            | 1,965              | 12          |
| Cell Death and Survival                                                       | cell death of endocrine cells           | 1,51E-03 |                            | 1,461              | 7           |
| Cell Death and Survival                                                       | delay in initiation of removal of cells | 1,56E-03 |                            |                    | 2           |
| Cell Death and Survival                                                       | necrosis of colon                       | 1,56E-03 |                            |                    | 2           |
| Cell Death and Survival                                                       | cell death of kidney cell lines         | 1,66E-03 |                            | 1,595              | 14          |
| Cell Death and Survival, Respiratory Disease                                  | apoptosis of pneumocytes                | 2,06E-03 |                            |                    | 3           |
| Cell Death and Survival                                                       | opsonization                            | 2,47E-03 |                            |                    | 3           |
| Cell Death and Survival                                                       | cell death of islet cells               | 3,19E-03 |                            | 1,461              | 6           |
| Cell Death and Survival                                                       | quantity of apoptotic cells             | 3,57E-03 |                            | 0,6                | 6           |
| Cell Death and Survival                                                       | apoptosis of kidney cell lines          | 3,90E-03 |                            | 1,336              | 11          |
| Cell Death and Survival                                                       | cell death of pericytes                 | 6,00E-03 |                            |                    | 3           |
| Cell Death and Survival                                                       | apoptosis of uterine cell lines         | 6,97E-03 |                            |                    | 2           |
| Cell Death and Survival                                                       | opsonization of cells                   | 6,97E-03 |                            |                    | 2           |
| Cell Death and Survival                                                       | cell death of intestinal cells          | 8,30E-03 |                            |                    | 4           |

**B**

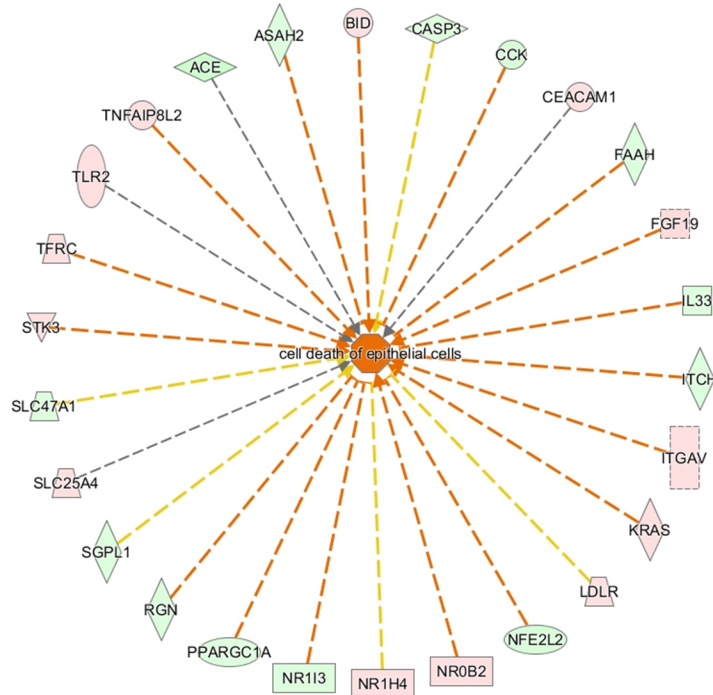

**Figure S2. Lepage et al.**



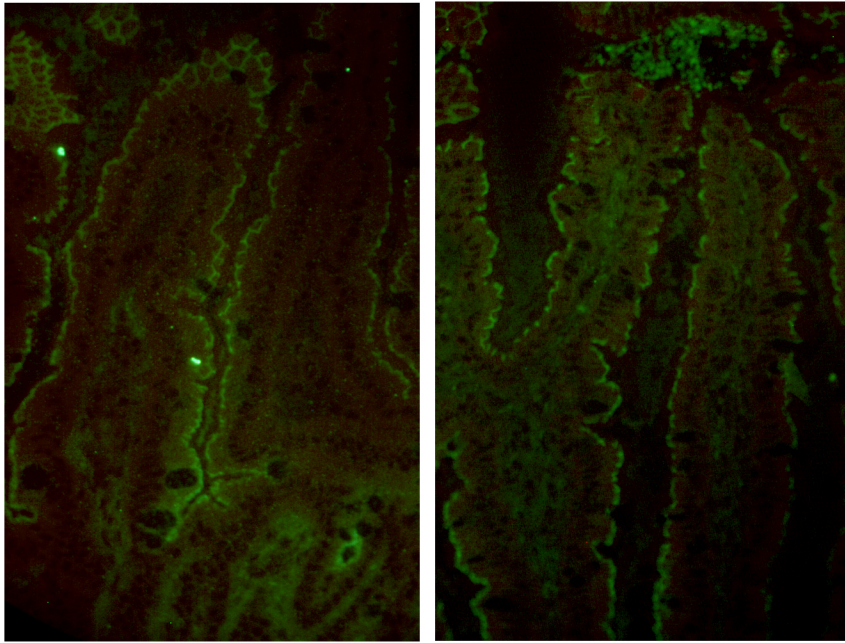

**Controls**

**Gata4<sup>ΔIEC</sup>**

**Figure S4. Lepage et al.**

**Table S1.** Comparative gene transcript expression of junctional molecules in the jejunum of *Gata4*<sup>ΔIEC</sup> and control mice (n=6 for each group).

| Gene transcript  | Fold difference ( <i>Gata4</i> <sup>ΔIEC</sup> /control) | <i>P</i> value (Student T-test) |
|------------------|----------------------------------------------------------|---------------------------------|
| Claudin-1        | 1.17 ± 0.1                                               | 0.16                            |
| <b>Claudin-2</b> | <b>6.59 ± 0.52</b>                                       | <b>0.0001</b>                   |
| Claudin-3        | 1.56 ± 0.06                                              | 0.0006                          |
| ZO-1             | 1.26 ± 0.07                                              | 0.01                            |
| JAM-1            | 1.28 ± 0.08                                              | 0.05                            |
| Occludin         | 1.24 ± 0.04                                              | 0.02                            |
| E-Cadherin       | 1.45 ± 0.08                                              | 0.007                           |

**Table S2.** Comparative gene transcript expression of inflammatory molecules in the jejunum of *Gata4*<sup>ΔIEC</sup> and control mice (n=6 for each group).

| Gene transcript | Fold difference ( <i>Gata4</i> <sup>ΔIEC</sup> /control) | <i>P</i> value (Student T-test) |
|-----------------|----------------------------------------------------------|---------------------------------|
| Icam1           | 1.43 ± 0.12                                              | 0.02                            |
| Cx3cr1          | 1.55 ± 0.26                                              | 0.05                            |
| Il-1β           | 0.62 ± 0.04                                              | 0.08                            |
| Cd5             | 1.67 ± 0.52                                              | 0.30                            |
| Cd69            | 1.54 ± 0.34                                              | 0.19                            |
| Il-1βr          | 1.15 ± 0.10                                              | 0.54                            |
| Il-23a          | 0.64 ± 0.13                                              | 0.22                            |
| Ccl20           | 1.19 ± 0.44                                              | 0.74                            |
| Ccr6            | 1.06 ± 0.55                                              | 0.92                            |
| Cxcl1           | 1.08 ± 0.22                                              | 0.82                            |
| Il-21           | 0.46 ± 0.15                                              | 0.29                            |
| Ccr4            | 0.46 ± 0.15                                              | 0.20                            |
| Cd25            | 1.27 ± 0.26                                              | 0.36                            |
| Cxcr4           | 1.39 ± 0.43                                              | 0.43                            |
| Foxp3           | 0.79 ± 0.26                                              | 0.51                            |
| Inf-γ           | 1.57 ± 0.41                                              | 0.33                            |
| Il-10           | 1.11 ± 0.14                                              | 0.60                            |
| Il-12p35        | 0.63 ± 0.22                                              | 0.60                            |
| Il-12p40        | 1.38 ± 0.22                                              | 0.42                            |
| Il-13           | 0.02 ± 0.01                                              | 0.15                            |
| Il-17           | 1.72 ± 0.90                                              | 0.54                            |
| Il-2            | 0.87 ± 0.21                                              | 0.67                            |
| Il-23r          | 1.73 ± 0.38                                              | 0.12                            |
| Il-24           | 0.67 ± 0.08                                              | 0.17                            |
| Tgfβ            | 1.11 ± 0.16                                              | 0.61                            |
| Tnfα            | 1.63 ± 0.34                                              | 0.15                            |

| Field   | Change | Value    | ID             | Symbol        | Enzyme Gene Name                                                                                    | Location            | Type(s)                    |
|---------|--------|----------|----------------|---------------|-----------------------------------------------------------------------------------------------------|---------------------|----------------------------|
| -13.036 |        | 3.79E-06 | Adora2b        | ADORA2B       | adenosine A2b receptor                                                                              | Plasma Membrane     | G-protein coupled receptor |
| -9.473  |        | 4.35E-02 | Slc2a2         | SLC2A2        | solute carrier family 2 (facilitated glucose transporter), member 2                                 | Plasma Membrane     | transporter                |
| -9.335  |        | 5.74E-05 | Slc2a1         | SLC2A1        | solute carrier family 2 (concentrative nucleoside transporter), member 1                            | Plasma Membrane     | transporter                |
| -8.886  |        | 1.53E-04 | Gm776          | Gm776         | predicted gene 766                                                                                  | Other               | other                      |
| -6.223  |        | 5.30E-05 | Apoc2          | APOC2         | apolipoprotein C-II                                                                                 | Extracellular Space | transporter                |
| -6.883  |        | 4.92E-05 | Sphk1          | SPHK1         | sphingosine kinase 1                                                                                | Cytoplasm           | kinase                     |
| -5.656  |        | 1.9E-02  | Bst1           | BST1          | bone marrow stromal cell antigen 1                                                                  | Plasma Membrane     | transporter                |
| -5.334  |        | 6.88E-05 | Apoc2          | APOC2         | apolipoprotein C-II                                                                                 | Extracellular Space | transporter                |
| -5.301  |        | 3.22E-04 | Slc22a5        | SLC22A5       | solute carrier family 25, member 45                                                                 | Cytoplasm           | transporter                |
| -5.234  |        | 4.86E-05 | Enpp7          | ENPP7         | ectonucleotide pyrophosphatase/phosphodiesterase 7                                                  | Plasma Membrane     | enzyme                     |
| -5.020  |        | 7.89E-05 | Acot12         | ACOT12        | acyl-CoA thioesterase 12                                                                            | Cytoplasm           | enzyme                     |
| -4.871  |        | 9.15E-04 | Cac2           | CAC2          | carbonic anhydrase II                                                                               | Cytoplasm           | enzyme                     |
| -4.841  |        | 8.83E-08 | Rec8           | REC8          | REC8 meiotic recombination protein                                                                  | Nucleus             | other                      |
| -4.723  |        | 3.47E-05 | Enpp7          | ENPP7         | ectonucleotide pyrophosphatase/phosphodiesterase 7                                                  | Plasma Membrane     | enzyme                     |
| -4.645  |        | 2.62E-04 | Apoa4          | APOA4         | apolipoprotein A-IV                                                                                 | Extracellular Space | transporter                |
| -4.552  |        | 1.01E-05 | Tim38          | TRIM38        | tripartite motif containing 38                                                                      | Other               | other                      |
| -4.503  |        | 6.83E-02 | Rbp2           | RBP2          | retinol binding protein 2, cellular                                                                 | Other               | other                      |
| -4.407  |        | 2.78E-04 | Slc2a2         | SLC2A2        | solute carrier family 2 (facilitated glucose transporter), member 2                                 | Plasma Membrane     | transporter                |
| -4.047  |        | 6.12E-05 | Rbp2           | RBP2          | retinol binding protein 2, cellular                                                                 | Other               | other                      |
| -3.824  |        | 2.54E-02 | Asb1           | ASB1          | ankyrin repeat and SOCS box containing 11                                                           | Nucleus             | transporter regulator      |
| -3.809  |        | 2.78E-03 | Fam151a        | FAM151A       | family with sequence similarity 151, member A                                                       | Extracellular Space | other                      |
| -3.777  |        | 6.45E-04 | Cop3           | COP3          | calpain 13                                                                                          | Other               | other                      |
| -3.731  |        | 2.90E-05 | Ltb4r1         | LTBR4R        | leukotriene B4 receptor                                                                             | Plasma Membrane     | G-protein coupled receptor |
| -3.611  |        | 4.73E-05 | Tim38          | TRIM38        | tripartite motif containing 38                                                                      | Other               | other                      |
| -3.503  |        | 3.23E-03 | Fam151a        | FAM151A       | family with sequence similarity 151, member A                                                       | Extracellular Space | other                      |
| -3.378  |        | 4.80E-04 | Adh1           | ADH1C         | alcohol dehydrogenase 1C (class I), gamma polypeptide                                               | Cytoplasm           | enzyme                     |
| -3.235  |        | 4.83E-04 | Cyp202b3       | CYP202B3      | cytochrome P450, family 2, subfamily b, polypeptide 23                                              | Other               | other                      |
| -3.233  |        | 2.47E-04 | Adh1           | ADH1C         | alcohol dehydrogenase 1C (class I), gamma polypeptide                                               | Cytoplasm           | enzyme                     |
| -3.220  |        | 2.95E-04 | Slc16a6        | SLC16A6       | solute carrier family 16, member 6                                                                  | Plasma Membrane     | transporter                |
| -3.188  |        | 1.78E-04 | Tlco2          | TLCO2         | TLCO domain containing 2                                                                            | Other               | other                      |
| -3.181  |        | 7.12E-04 | Poa3           | POA3          | protoporphyrin oxidase                                                                              | Extracellular Space | peptidase                  |
| -3.160  |        | 6.29E-05 | Sefc4l2        | SEFC4L2       | SEF14C2-like 2 (S. cerevisiae)                                                                      | Extracellular Space | transporter                |
| -3.156  |        | 1.83E-03 | S100a8         | S100A8        | S100 calcium binding protein A8                                                                     | Cytoplasm           | other                      |
| -3.127  |        | 5.09E-04 | Slc22a2        | SLC22A2       | solute carrier family 2 (facilitated glucose transporter), member 2                                 | Plasma Membrane     | transporter                |
| -3.089  |        | 8.96E-05 | Slc1a3         | SLC1A3        | solute carrier family 1 (glial high affinity glutamate transporter), member 3                       | Plasma Membrane     | transporter                |
| -3.081  |        | 4.64E-04 | S100a9         | S100A9        | S100 calcium binding protein A9                                                                     | Cytoplasm           | other                      |
| -3.070  |        | 1.70E-03 | Rdn2           | RDN2          | D-3-hydroxybutyrate dehydrogenase, type 2                                                           | Plasma Membrane     | enzyme                     |
| -2.991  |        | 3.49E-04 | Glpd2          | GLYPD2        | glycolipid transfer protein domain containing 2                                                     | Other               | other                      |
| -2.962  |        | 5.55E-05 | Elmo2          | ELMO2         | engulfment and cell motility 2                                                                      | Cytoplasm           | transporter                |
| -2.931  |        | 1.08E-03 | Apoa4          | APOA4         | apolipoprotein A-IV                                                                                 | Extracellular Space | transporter                |
| -2.929  |        | 8.77E-05 | Ltb4r2         | LTBR4R        | leukotriene B4 receptor 2                                                                           | Plasma Membrane     | G-protein coupled receptor |
| -2.928  |        | 4.02E-04 | Rse1           | RSE1          | R-nucleosidase, ecto (CD73)                                                                         | Plasma Membrane     | phosphatase                |
| -2.878  |        | 1.34E-04 | Cda            | CDA           | cytidine deaminase                                                                                  | Nucleus             | enzyme                     |
| -2.839  |        | 8.20E-05 | Lmcd1          | LMCD1         | LIM and cysteine-rich domains 1                                                                     | Other               | transporter regulator      |
| -2.823  |        | 9.28E-04 | Gm156          | Gm156         | predicted gene 156                                                                                  | Other               | other                      |
| -2.761  |        | 2.21E-04 | Ccdc114        | CCDC114       | coiled-coil domain containing 114                                                                   | Extracellular Space | other                      |
| -2.752  |        | 1.36E-02 | Cyp202b1       | CYP202B1      | cytochrome P450, family 2, subfamily C, polypeptide 18                                              | Other               | other                      |
| -2.725  |        | 3.91E-05 | Prrs12         | PRRS12        | pleckstrin homology domain containing, family F (with FYVE domain) member 1                         | Extracellular Space | peptidase                  |
| -2.701  |        | 8.01E-03 | Plekha1        | PLEKH1        | LIM and cysteine-rich domains 1                                                                     | Cytoplasm           | transporter regulator      |
| -2.702  |        | 8.14E-05 | Lmcd1          | LMCD1         | LIM and cysteine-rich domains 1                                                                     | Cytoplasm           | enzyme                     |
| -2.712  |        | 2.04E-03 | Cyp202b2       | CYP202B2      | cytochrome P450, family 2, subfamily d, polypeptide 26                                              | Cytoplasm           | enzyme                     |
| -2.711  |        | 4.03E-04 | Tlco2          | TLCO2         | TLCO domain containing 2                                                                            | Other               | other                      |
| -2.686  |        | 1.01E-03 | Tcpv5          | TCPV5         | T cell receptor gamma, variable 5                                                                   | Other               | other                      |
| -2.684  |        | 6.19E-05 | Vsk1           | VSK1          | visual system homeobox 1                                                                            | Nucleus             | transporter regulator      |
| -2.684  |        | 1.12E-04 | Unc53a         | UNC53A        | unc-53 homolog A (C. elegans)                                                                       | Plasma Membrane     | transporter                |
| -2.680  |        | 1.43E-03 | Apoa4          | APOA4         | GAMP responsive element binding protein 3-like 3                                                    | Extracellular Space | transporter                |
| -2.661  |        | 1.98E-04 | Ceb3l3         | CEB3L3        | GAMP responsive element binding protein 3-like 3                                                    | Extracellular Space | transporter                |
| -2.650  |        | 7.19E-05 | Oca2           | OCA2          | OCA2 domain containing 2                                                                            | Cytoplasm           | other                      |
| -2.642  |        | 5.54E-04 | Z21407116Rik   | Z21407116Rik  | Z21407116 gene                                                                                      | Other               | other                      |
| -2.627  |        | 8.23E-04 | Gpr151         | GPR151        | G-protein-coupled receptor 151                                                                      | Plasma Membrane     | G-protein coupled receptor |
| -2.603  |        | 8.33E-05 | Cmt1           | CMT1          | creatine kinase, mitochondrial 1, ubiquitous                                                        | Cytoplasm           | kinase                     |
| -2.592  |        | 1.41E-03 | Slc16a8        | SLC16A8       | solute carrier family 16, member 8                                                                  | Plasma Membrane     | transporter                |
| -2.586  |        | 7.28E-05 | Gde1           | GDE1          | glycerophosphodiester phosphodiesterase 1                                                           | Other               | enzyme                     |
| -2.582  |        | 8.71E-05 | Prrc2          | PRRC2         | proteoglycan 2, bone marrow (natural killer cell activator, eosinophil granule major basic protein) | Extracellular Space | transporter                |
| -2.579  |        | 1.51E-04 | Ttrif2/Ttrif22 | TTRIF2        | tumor necrosis factor receptor superfamily, member 22                                               | Plasma Membrane     | transmembrane receptor     |
| -2.523  |        | 1.02E-04 | Gde1           | GDE1          | glycerophosphodiester phosphodiesterase 1                                                           | Other               | enzyme                     |
| -2.498  |        | 7.51E-05 | Oca2           | OCA2          | OCA2 domain containing 2                                                                            | Cytoplasm           | other                      |
| -2.485  |        | 1.61E-04 | Tll2           | TLL2          | tubulin tyrosine ligase-like family, member 2                                                       | Other               | other                      |
| -2.481  |        | 1.48E-05 | Mdh2           | MDH2          | malate dehydrogenase 2, NAD (mitochondrial)                                                         | Cytoplasm           | enzyme                     |
| -2.468  |        | 9.52E-03 | Cyp202b6       | CYP202B6      | cytochrome P450, family 2, subfamily d, polypeptide 26                                              | Plasma Membrane     | G-protein coupled receptor |
| -2.456  |        | 1.11E-04 | Lypd1          | LYPD1         | LYBPLAUR domain containing 1                                                                        | Plasma Membrane     | G-protein coupled receptor |
| -2.453  |        | 1.04E-02 | Cyp202b6       | CYP202B6      | cytochrome P450, family 2, subfamily d, polypeptide 26                                              | Plasma Membrane     | G-protein coupled receptor |
| -2.441  |        | 3.98E-04 | Ntse           | NTSE          | 5'-nucleotidase, ecto (CD73)                                                                        | Plasma Membrane     | phosphatase                |
| -2.411  |        | 1.55E-04 | Pak97          | PAK97         | progesterin and adipoQ receptor family member VII                                                   | Plasma Membrane     | other                      |
| -2.407  |        | 2.15E-04 | Tmem86a        | TMEM86A       | transmembrane protein 86a                                                                           | Plasma Membrane     | other                      |
| -2.391  |        | 4.76E-04 | Usp18          | USP18         | ubiquitin specific peptidase 18                                                                     | Cytoplasm           | peptidase                  |
| -2.390  |        | 1.32E-02 | Csm2c3         | CSDMC3        | gandemic C                                                                                          | Cytoplasm           | other                      |
| -2.387  |        | 1.31E-04 | Soc2           | SOCC          | short coiled-coil protein                                                                           | Extracellular Space | growth factor              |
| -2.386  |        | 1.30E-04 | Muc4           | MUC4          | mucin 4, cell surface associated                                                                    | Extracellular Space | glycoprotein               |
| -2.379  |        | 5.96E-03 | Ilf8           | ILF8          | interleukin 18 (interferon-gamma-inducing factor)                                                   | Extracellular Space | cytokine                   |
| -2.378  |        | 1.55E-04 | Prrs12         | PRRS12        | pleckstrin homology domain containing, family F (with FYVE domain) member 1                         | Extracellular Space | peptidase                  |
| -2.365  |        | 1.83E-04 | Apoc3          | APOC3         | apolipoprotein C-III                                                                                | Extracellular Space | transporter                |
| -2.362  |        | 6.44E-04 | Tcpv4          | TCPV4         | T cell receptor gamma, variable 4                                                                   | Other               | other                      |
| -2.354  |        | 1.95E-04 | Hbch           | HCH           | 3-hydroxybutyryl-CoA lyase                                                                          | Cytoplasm           | enzyme                     |
| -2.339  |        | 3.33E-04 | Gstk1          | GSTK1         | glutathione S-transferase kappa 1                                                                   | Cytoplasm           | enzyme                     |
| -2.316  |        | 1.64E-03 | Galt           | GALT          | galactose-1-phosphate uridylyltransferase                                                           | Cytoplasm           | enzyme                     |
| -2.310  |        | 3.45E-04 | Gstk1          | GSTK1         | glutathione S-transferase kappa 1                                                                   | Cytoplasm           | enzyme                     |
| -2.290  |        | 1.08E-04 | Scamp5         | SCAMP5        | secretory carrier membrane protein 5                                                                | Cytoplasm           | other                      |
| -2.279  |        | 1.89E-04 | Cnm2           | CNM2          | cognin 2                                                                                            | Plasma Membrane     | transporter                |
| -2.258  |        | 2.30E-04 | Pcd3           | PLCD3         | phospholipase C, delta 3                                                                            | Cytoplasm           | enzyme                     |
| -2.254  |        | 1.81E-04 | Muc4           | MUC4          | mucin 4, cell surface associated                                                                    | Extracellular Space | growth factor              |
| -2.220  |        | 5.22E-04 | Sytl2          | SYTL2         | Rap guanine nucleotide exchange factor (GEF) 6                                                      | Plasma Membrane     | other                      |
| -2.218  |        | 1.88E-03 | T17005501Rik   | T17005501Rik  | transmembrane-like 2                                                                                | Other               | other                      |
| -2.188  |        | 3.82E-04 | Plekha1        | PLEKH1        | pleckstrin homology domain containing, family F (with FYVE domain) member 1                         | Cytoplasm           | transporter regulator      |
| -2.181  |        | 7.91E-04 | Timp1          | TIMP1         | TIMP metalloproteinase inhibitor 1                                                                  | Other               | other                      |
| -2.164  |        | 2.14E-04 | Tha1           | THA1          | threonine aldolase 1                                                                                | Cytoplasm           | phosphatase                |
| -2.157  |        | 2.50E-03 | Nudt5          | NUDT5         | nucleoside diphosphate linked moiety X-type motif 5                                                 | Other               | phosphatase                |
| -2.155  |        | 1.71E-03 | Cxcl3          | CXCL3         | chemokine (C-X-C motif) ligand 3                                                                    | Plasma Membrane     | transporter                |
| -2.149  |        | 1.22E-03 | Slc22a2        | SLC22A2       | solute carrier family 2 (concentrative nucleoside transporter), member 2                            | Plasma Membrane     | transporter                |
| -2.136  |        | 5.76E-03 | Hoxa9          | HXA9          | homeobox A9                                                                                         | Nucleus             | transporter regulator      |
| -2.117  |        | 7.39E-04 | Unc53a         | UNC53A        | unc-53 homolog A (C. elegans)                                                                       | Plasma Membrane     | transporter                |
| -2.115  |        | 1.22E-03 | Altha1         | ALTHA1        | aldose 1-epimerase 4, family member A1                                                              | Cytoplasm           | enzyme                     |
| -2.113  |        | 2.54E-04 | Slc5a9         | SLC5A9        | solute carrier family 5 (sodium/sugar cotransporter), member 9                                      | Plasma Membrane     | transporter                |
| -2.113  |        | 6.53E-03 | Srpb           | SNRBP         | small nuclear ribonucleoprotein polypeptides B and B1                                               | Nucleus             | other                      |
| -2.108  |        | 1.91E-03 | Hvcn1          | HVCN1         | hygrogen voltage-gated channel 1                                                                    | Plasma Membrane     | ion channel                |
| -2.108  |        | 1.38E-03 | Nova1          | NOVA1         | neuro-oncological ventral antigen 1                                                                 | Nucleus             | other                      |
| -2.095  |        | 1.19E-02 | Bgalts         | BGALTS        | UDP-Gal beta(1-6)GalNAc-6S transferase, polypeptide 5                                               | Cytoplasm           | enzyme                     |
| -2.077  |        | 1.22E-02 | Nbeal1         | NBEAL1        | neurobeachin-like 1                                                                                 | Other               | other                      |
| -2.073  |        | 1.42E-04 | Timem83        | TMEM83        | transmembrane protein 83                                                                            | Other               | other                      |
| -2.072  |        | 4.35E-02 | Cyp202b2       | CYP202B2      | cytochrome P450, family 2, subfamily d, polypeptide 26                                              | Plasma Membrane     | G-protein coupled receptor |
| -2.071  |        | 5.56E-03 | Orf1221        | ORF1221       | orf1221                                                                                             | Other               | other                      |
| -2.070  |        | 6.22E-04 | Hsp2d          | HSP2D         | heat shock protein 22 domain containing protein kinase 2                                            | Nucleus             | kinase                     |
| -2.057  |        | 1.02E-03 | Hilp2          | HILP2         | high density lipoprotein binding protein 2                                                          | Nucleus             | transporter                |
| -2.049  |        | 2.33E-03 | Necab1         | NECAB1        | N-terminal EF-hand calcium binding protein 1                                                        | Cytoplasm           | other                      |
| -2.048  |        | 1.46E-04 | Mmp9           | MMP9          | matrix metalloproteinase 9 (gelatinase B, 92kDa gelatinase, 92kDa type IV collagenase)              | Extracellular Space | peptidase                  |
| -2.040  |        | 3.01E-04 | 4933422H2ORik  | 4933422H2ORik | RIKEN cDNA 4933422H02 gene                                                                          | Other               | other                      |
| -2.039  |        | 2.08E-04 | Soc2           | SOCC          | short coiled-coil protein                                                                           | Cytoplasm           | other                      |
| -2.038  |        | 1.17E-02 | Gtra3          | GLRA3         | glycylglycyltransferase                                                                             | Plasma Membrane     | ion channel                |
| -2.028  |        | 1.81E-03 | Timp1          | TIMP1         | TIMP metalloproteinase inhibitor 1                                                                  | Other               | other                      |
| -2.020  |        | 2.78E-02 | Csm2c3         | CSDMC3        | gandemic C                                                                                          | Extracellular Space | other                      |
| -2.011  |        | 2.18E-04 | Slc5a9         | SLC5A9        | solute carrier family 5 (sodium/sugar cotransporter), member 9                                      | Plasma Membrane     | transporter                |
| -2.001  |        | 5.79E-02 | Vpreb2         | VPREB2        | pre-B cell lymphocyte gene 1                                                                        | Plasma Membrane     | transporter                |
| -2.000  |        | 6.28E-03 | Bdnf           | BDNF          | brain-derived neurotrophic factor                                                                   | Extracellular Space | growth factor              |
| -2.004  |        | 2.77E-04 | Scn            | SCN           | scandium                                                                                            | Cytoplasm           | other                      |
| -2.000  |        | 1.07E-02 | Gals           | GAL3          | galactosyltransferase (L)-oxidase                                                                   | Cytoplasm           | enzyme                     |
| -2.009  |        | 2.57E-04 | Ppy6           | P2RY6         | pyridinergic receptor P2Y6, G-protein coupled, 6                                                    | Plasma Membrane     | G-protein coupled receptor |
| -2.009  |        | 4.29E-02 | Pfif1          | PFI1          | perforin 1 (pore forming protein)                                                                   | Cytoplasm           | enzyme                     |
| -2.010  |        | 4.86E-04 | Mett7b         | METTL7B       | methyltransferase like 7B                                                                           | Other               | peptidase                  |
| -2.013  |        | 6.83E-03 | Usp13          | USP13         | ubiquitin specific peptidase 13 (isopeptidase T-3)                                                  | Other               | peptidase                  |
| -2.015  |        | 4.59E-03 | Nudt4          | NUDT4         | nucleoside diphosphate linked moiety X-type motif 4                                                 | Other               | phosphatase                |
| -2.017  |        | 4.17E-03 | Ly8a           | LY8A          | lymphocyte antigen 6 complex, locus A                                                               | Plasma Membrane     | transporter                |
| -2.022  |        | 4.70E-02 | Dt1            | DT1           | down-regulator of transcription 1, TBP-binding (negative cofactor 2)                                | Other               | transporter regulator      |
| -2.022  |        | 3.53E-04 | Pmkv           | PMKV          | phosphomevalonate kinase                                                                            | Cytoplasm           | enzyme                     |
| -2.030  |        | 3.08E-04 | Orf1178        | ORF1178       | orf1178                                                                                             | Plasma Membrane     | G-protein coupled receptor |
| -2.032  |        | 6.87E-03 | Sncg2          | SNCG2         | solute carrier family 11 (proton-coupled divalent metal ion transporter), member 2                  | Plasma Membrane     | transporter                |
| -2.036  |        | 2.22E-02 | Igfb2          | IGFB2         | integrin beta 2-like                                                                                | Plasma Membrane     | transporter                |



|       |          |               |               |                                                                                      |                     |                            |
|-------|----------|---------------|---------------|--------------------------------------------------------------------------------------|---------------------|----------------------------|
| 2193  | 1.67E-02 | Meel          | MAEL          | matronin spermatogenic transposon attenuator                                         | Cytoplasm           | other                      |
| 2194  | 2.03E-04 | Piprd         | Piprd         | protein tyrosine phosphatase, receptor type, D                                       | Plasma Membrane     | phosphatase                |
| 2198  | 4.17E-04 | Grp1          | GRP1          | glutamate receptor interacting protein 1                                             | Plasma Membrane     | transcription regulator    |
| 2198  | 1.63E-04 | Atz9b1        | ATZ9B1        | ATPase, Ca <sup>2+</sup> transporting, plasma membrane 1                             | Plasma Membrane     | transporter                |
| 2198  | 3.69E-02 | Tpr           | TPR           | transcribed promoter region, nuclear basket protein                                  | Nucleus             | transporter                |
| 2200  | 3.39E-04 | Hmgcr         | HMGCR         | 3-hydroxy-3-methylglutaryl-CoA reductase                                             | Nucleus             | enzyme                     |
| 2202  | 3.88E-04 | Ghrl          | GHRL          | ghrelin/obestatin prepropeptide                                                      | Extracellular Space | growth factor              |
| 2210  | 1.84E-02 | Psoir1c2      | PSORS1C2      | psoriasis susceptibility 1 candidate 2                                               | Extracellular Space | other                      |
| 2212  | 1.33E-02 | Sypl1-ps1     | Sypl1-ps1     | synaptosomal complex protein 1, pseudogene 1                                         | Other               | other                      |
| 2216  | 3.77E-03 | Gk4           | GRK4          | G protein-coupled receptor kinase 4                                                  | Plasma Membrane     | kinase                     |
| 2224  | 4.53E-04 | Cap2          | CAP2          | CAP, adenylate cyclase-associated protein, 2 (yeast)                                 | Plasma Membrane     | enzyme                     |
| 2225  | 7.27E-04 | Tst           | TST           | trichostatin A sulfotransferase (hydrolase)                                          | Cytoplasm           | enzyme                     |
| 2229  | 1.45E-02 | Ef4e1b        | EFA4E1B       | eukaryotic translation initiation factor 4E family member 1B                         | Other               | enzyme                     |
| 2243  | 1.98E-04 | Atk           | ATK           | adenosine kinase                                                                     | Other               | kinase                     |
| 2243  | 4.73E-04 | Mti           | MTIE          | metallothionein 1E                                                                   | Cytoplasm           | other                      |
| 2247  | 6.79E-04 | Ghrl          | GHRL          | ghrelin/obestatin prepropeptide                                                      | Extracellular Space | growth factor              |
| 2249  | 3.51E-03 | Akr1c19       | Akr1c19       | aldoketo reductase family 1, member C19                                              | Other               | other                      |
| 2255  | 1.97E-04 | Aldoc         | ALDOC         | aldolase C, fructose-bisphosphate                                                    | Cytoplasm           | enzyme                     |
| 2258  | 1.98E-02 | Tsf12         | Tsf12         | transcription factor 12                                                              | Nucleus             | transcription regulator    |
| 2268  | 2.78E-03 | 4930430A15Rik | 4930430A15Rik | RIKEN cDNA 4930430A15 gene                                                           | Nucleus             | transcription regulator    |
| 2271  | 2.99E-04 | Fbxo32        | Fbxo32        | F-box protein 32                                                                     | Cytoplasm           | enzyme                     |
| 2273  | 5.62E-03 | 4933403008Rik | 4933403008Rik | RIKEN cDNA 4933403008 gene                                                           | Cytoplasm           | enzyme                     |
| 2280  | 1.82E-04 | Hsd17b7       | HSD17B7       | hydroxysteroid (17-beta) dehydrogenase 7                                             | Cytoplasm           | enzyme                     |
| 2283  | 1.72E-02 | F8            | WDHR1         | WD repeat domain 18                                                                  | Cytoplasm           | enzyme                     |
| 2286  | 1.36E-02 | Or382         | OR382         | olfactory receptor 382                                                               | Plasma Membrane     | G-protein coupled receptor |
| 2287  | 5.34E-04 | Uglt1a6b      | UGT1A6B       | UDP glucucosyltransferase 1 family, polypeptide A6                                   | Cytoplasm           | enzyme                     |
| 2290  | 1.64E-04 | Papsr1        | PAPSS1        | 3'-phosphoadenosine 5'-phosphatase synthase 1                                        | Cytoplasm           | enzyme                     |
| 2295  | 2.35E-04 | Piscr1        | PISC1         | phospholipid scramblase 1                                                            | Plasma Membrane     | enzyme                     |
| 2296  | 5.64E-04 | Nlr1b         | WDHR1         | WD repeat domain 18                                                                  | Cytoplasm           | enzyme                     |
| 2302  | 1.03E-03 | Alah1a1       | ALDH1A1       | aldehyde dehydrogenase 1 family, member A1                                           | Cytoplasm           | enzyme                     |
| 2309  | 6.40E-03 | Gulf1         | GULF1         | GULF1 GTPase homolog (S. cerevisiae)                                                 | Cytoplasm           | other                      |
| 2313  | 1.07E-04 | Tfpi          | TFPI          | tissue factor pathway inhibitor (proteinase-associated coagulation inhibitor)        | Extracellular Space | other                      |
| 2314  | 1.39E-02 | Taf7          | TAF7          | TAF7 RNA polymerase II, TATA box binding protein (TBP)-associated factor, 59kDa      | Nucleus             | transcription regulator    |
| 2317  | 1.39E-02 | Taf7          | TAF7          | TAF7 RNA polymerase II, TATA box binding protein (TBP)-associated factor, 59kDa      | Nucleus             | transcription regulator    |
| 2324  | 2.92E-04 | Hoxb7         | Hoxb7         | homeobox B7                                                                          | Nucleus             | transcription regulator    |
| 2340  | 2.46E-04 | Pmm2          | PRMT2         | protein arginine methyltransferase 2                                                 | Nucleus             | enzyme                     |
| 2350  | 1.27E-02 | Tmem65        | TMEM65        | transmembrane protein 65                                                             | Cytoplasm           | enzyme                     |
| 2354  | 2.95E-02 | Dct           | DC1           | dopachrome tautomerase                                                               | Cytoplasm           | enzyme                     |
| 2356  | 7.09E-03 | Alg3          | ATG3          | autophagy related 3                                                                  | Cytoplasm           | enzyme                     |
| 2369  | 1.06E-04 | Papsr1        | PAPSS1        | 3'-phosphoadenosine 5'-phosphatase synthase 1                                        | Cytoplasm           | enzyme                     |
| 2370  | 3.78E-02 | Serpin3k      | Serpin3k      | serpin (or cysteine) peptidase inhibitor, clade A, member 3K                         | Extracellular Space | other                      |
| 2380  | 6.40E-04 | Nr2           | IPR2          | inositol 1,4,5-trisphosphate receptor, type 2                                        | Cytoplasm           | ion channel                |
| 2383  | 1.97E-03 | Sic2a20b      | SIC2A20B      | solute carrier family 6 (neurotransmitter transporter), member 20B                   | Plasma Membrane     | transporter                |
| 2410  | 1.29E-02 | Cpb2          | CPB2          | carboxypeptidase B2 (plasma)                                                         | Extracellular Space | peptidase                  |
| 2411  | 8.02E-03 | Camk2a        | CAMK2A        | calcium/calmodulin-dependent protein kinase II alpha                                 | Extracellular Space | enzyme                     |
| 2420  | 2.42E-02 | Or292         | OR292         | olfactory receptor 297                                                               | Plasma Membrane     | G-protein coupled receptor |
| 2427  | 1.09E-03 | Rnat          | RNAT          | indolethylamine N-methyltransferase                                                  | Cytoplasm           | enzyme                     |
| 2460  | 3.72E-04 | Or771         | OR771         | olfactory receptor 771                                                               | Plasma Membrane     | G-protein coupled receptor |
| 2494  | 3.39E-02 | Ank1          | ANKK1         | ankyrin repeat and kinase domain containing 1                                        | Cytoplasm           | kinase                     |
| 2500  | 2.15E-04 | Hyl3          | TYR13         | tyrosinase family member 3                                                           | Cytoplasm           | ion channel                |
| 2510  | 7.74E-04 | Ssl4          | SSTR4         | serotonergic receptor 4                                                              | Plasma Membrane     | G-protein coupled receptor |
| 2512  | 4.72E-02 | Abllm1        | ABL1M1        | actin binding LIM protein 1                                                          | Cytoplasm           | other                      |
| 2518  | 1.32E-03 | Fah2          | FA2H          | fatty acid 2-lyase                                                                   | Cytoplasm           | enzyme                     |
| 2519  | 1.47E-04 | Fbxo32        | Fbxo32        | F-box protein 32                                                                     | Cytoplasm           | enzyme                     |
| 2537  | 3.92E-03 | Tmem2         | TMEM2         | T cell immunoglobulin and mucin domain containing 2                                  | Plasma Membrane     | enzyme                     |
| 2543  | 7.77E-03 | Cpb2          | CPB2          | carboxypeptidase B2 (plasma)                                                         | Extracellular Space | peptidase                  |
| 2564  | 3.45E-02 | Cyp2c70       | CYP2C70       | cytochrome P450, family 2, subfamily C, polypeptide 70                               | Cytoplasm           | enzyme                     |
| 2579  | 2.27E-02 | Erm1          | ERN1          | erythrocyte reticulum to nucleus signaling 1                                         | Cytoplasm           | enzyme                     |
| 2581  | 3.60E-02 | Serpin10      | SERPINA10     | serpin peptidase inhibitor, clade A (alpha-1 antitrypsinase, antitrypsin), member 10 | Extracellular Space | other                      |
| 2588  | 9.17E-08 | Mps1          | MPS1          | mercaptopyruvate sulfurtransferase                                                   | Extracellular Space | enzyme                     |
| 2604  | 1.32E-04 | Pmp22         | PMP22         | peripheral myelin protein 22                                                         | Plasma Membrane     | enzyme                     |
| 2634  | 1.44E-02 | Slic1b3       | SLIC1B3       | solute carrier organic anion transporter family, member 1B3                          | Plasma Membrane     | transporter                |
| 2653  | 1.92E-04 | Krt84         | KRT84         | keratin 84                                                                           | Cytoplasm           | other                      |
| 2654  | 1.38E-04 | Xrnp2p2       | XPMP2P2       | X-ray aminopeptidase (aminopeptidase P) 2, membrane bound                            | Plasma Membrane     | peptidase                  |
| 2678  | 2.15E-04 | Uglt2b        | UGT2B         | UDP glucucosyltransferase 2 family, polypeptide B7                                   | Cytoplasm           | enzyme                     |
| 2686  | 1.54E-03 | Or128         | OR128         | olfactory receptor 128                                                               | Plasma Membrane     | G-protein coupled receptor |
| 2688  | 4.76E-02 | Itih4         | ITIH4         | inter-alpha-trypsin inhibitor heavy chain family, member 4                           | Extracellular Space | other                      |
| 2701  | 1.11E-02 | Tbx15         | TBX15         | T-box 15                                                                             | Nucleus             | transcription regulator    |
| 2736  | 9.84E-05 | Tceb1         | TCEB1         | transcription elongation factor A (SII)-like 8                                       | Other               | other                      |
| 2742  | 5.62E-04 | Fhl1          | FHL1          | four and a half LIM domains 1                                                        | Plasma Membrane     | phosphatase                |
| 2754  | 5.99E-04 | Fhl1          | FHL1          | four and a half LIM domains 1                                                        | Cytoplasm           | other                      |
| 2765  | 1.99E-04 | Nsdhl         | NSDHL         | NAD(P) dependent steroid dehydrogenase-like                                          | Cytoplasm           | enzyme                     |
| 2771  | 5.05E-05 | Ocm           | OCM           | oncomodulin                                                                          | Cytoplasm           | enzyme                     |
| 2800  | 7.70E-05 | Pibf1         | PIBF1         | progestosterone immunomodulatory binding factor 1                                    | Nucleus             | other                      |
| 2807  | 1.82E-02 | Vepp1         | VERP1         | ventricular zone expressed PH domain-containing 1                                    | Other               | other                      |
| 2814  | 3.31E-04 | Cpn1          | CPN1          | carboxypeptidase N, polypeptide 1                                                    | Extracellular Space | peptidase                  |
| 2814  | 3.72E-04 | Piprd         | Piprd         | protein tyrosine phosphatase, receptor type, D                                       | Plasma Membrane     | phosphatase                |
| 2835  | 4.57E-04 | 3300005001Rik | 3300005001Rik | RIKEN cDNA 3300005001 gene                                                           | Other               | other                      |
| 2867  | 4.45E-04 | Fhl1          | FHL1          | four and a half LIM domains 1                                                        | Cytoplasm           | other                      |
| 2869  | 1.19E-04 | Nsdhl         | NSDHL         | NAD(P) dependent steroid dehydrogenase-like                                          | Cytoplasm           | enzyme                     |
| 2877  | 1.46E-02 | Cyp2e1        | CYP2E1        | cytochrome P450, family 2, subfamily E, polypeptide 1                                | Cytoplasm           | enzyme                     |
| 2880  | 1.50E-04 | Hoxb7         | Hoxb7         | homeobox B7                                                                          | Cytoplasm           | enzyme                     |
| 2901  | 1.58E-04 | Nsdhl         | NSDHL         | NAD(P) dependent steroid dehydrogenase-like                                          | Nucleus             | transcription regulator    |
| 2907  | 1.82E-02 | Itih1         | ITIH1         | inter-alpha-trypsin inhibitor heavy chain 1                                          | Extracellular Space | enzyme                     |
| 2924  | 1.19E-04 | Xrnp2p2       | XPMP2P2       | X-ray aminopeptidase (aminopeptidase P) 2, membrane bound                            | Plasma Membrane     | peptidase                  |
| 2954  | 5.81E-05 | 9130024F11Rik | 9130024F11Rik | RIKEN cDNA 9130024F11 gene                                                           | Other               | other                      |
| 2973  | 7.95E-05 | Piscr1        | PISC1         | phospholipid scramblase 1                                                            | Plasma Membrane     | enzyme                     |
| 3016  | 3.91E-03 | Mtmr8         | MTMR8         | myotubularin related protein 6                                                       | Plasma Membrane     | phosphatase                |
| 3109  | 9.38E-04 | Cyp2c55       | CYP2C55       | cytochrome P450, family 2, subfamily C, polypeptide 55                               | Cytoplasm           | enzyme                     |
| 3189  | 1.79E-04 | E2k4.1k4      | EPK14A        | erythrocyte membrane protein band 4.1 like 4A                                        | Extracellular Space | enzyme                     |
| 3205  | 7.98E-05 | Slc13a2       | SLC13A2       | solute carrier family 13 (sodium-dependent dicarboxylate transporter), member 2      | Plasma Membrane     | transporter                |
| 3208  | 3.34E-05 | Fgfp1         | FGF1P1        | fibroblast growth factor binding protein 1                                           | Extracellular Space | other                      |
| 3217  | 1.28E-04 | Uglt2b        | UGT2B         | UDP glucucosyltransferase 2 family, polypeptide B7                                   | Cytoplasm           | enzyme                     |
| 3220  | 1.14E-04 | Rasd2         | RASD2         | RASD family, member 2                                                                | Cytoplasm           | enzyme                     |
| 3291  | 4.81E-05 | Cyp51a1       | CYP51A1       | cytochrome P450, family 51, subfamily A, polypeptide 1                               | Cytoplasm           | enzyme                     |
| 3257  | 4.42E-05 | Cab1e1        | CABLE1        | CsB5 and Abl enzyme substrate 1                                                      | Nucleus             | enzyme                     |
| 3310  | 5.48E-03 | Ttr           | TTR           | transthyretin                                                                        | Extracellular Space | transporter                |
| 3336  | 8.52E-05 | 4732465J04Rik | 4732465J04Rik | RIKEN cDNA 4732465J04 gene                                                           | Other               | other                      |
| 3379  | 9.40E-05 | Ab3bp         | ABI3BP        | ABI family, member 3 (NESR1) binding protein                                         | Extracellular Space | other                      |
| 3423  | 2.96E-04 | Tmem2         | TMEM2         | T cell immunoglobulin and mucin domain containing 2                                  | Plasma Membrane     | enzyme                     |
| 3437  | 3.56E-03 | Uglt1a2       | UGT1A2        | UDP glucucosyltransferase 1 family, polypeptide A3                                   | Cytoplasm           | enzyme                     |
| 3569  | 4.18E-02 | Map3          | MAP3          | major urinary protein 1                                                              | Plasma Membrane     | other                      |
| 3573  | 8.08E-05 | Bex4          | BE4           | brain expressed, X-linked 4                                                          | Extracellular Space | other                      |
| 3587  | 3.58E-02 | Itih4         | ITIH4         | inter-alpha-trypsin inhibitor heavy chain family, member 4                           | Cytoplasm           | other                      |
| 3591  | 9.72E-05 | Pks9          | PKS9          | proprotein convertase subtilisin/kexin type 9                                        | Extracellular Space | peptidase                  |
| 3628  | 1.41E-04 | Ef4ebp3       | EFA4EBP3      | eukaryotic translation initiation factor 4E binding protein 3                        | Cytoplasm           | other                      |
| 3640  | 2.82E-02 | Kne1          | KNE1          | kiningsen 1                                                                          | Extracellular Space | other                      |
| 3629  | 4.36E-02 | Fga           | FGA           | fortrogen alpha chain                                                                | Extracellular Space | transporter                |
| 3646  | 5.59E-05 | Slc13a1       | SLC13A1       | solute carrier family 13 (sodium/sulfate symporter), member 1                        | Plasma Membrane     | transporter                |
| 4093  | 3.79E-05 | Lam3          | LAMB3         | laminin, beta 3                                                                      | Extracellular Space | transporter                |
| 4085  | 4.54E-05 | Pmp22         | PMP22         | peripheral myelin protein 22                                                         | Plasma Membrane     | transporter                |
| 4353  | 4.15E-02 | Pnlp          | PNLP          | pancreatic lipase                                                                    | Extracellular Space | enzyme                     |
| 4355  | 2.99E-05 | Zdhc19        | ZDHHC19       | zinc finger, DHHC-type containing 19                                                 | Cytoplasm           | enzyme                     |
| 4493  | 4.13E-02 | Hpx           | HPX           | hemopexin                                                                            | Extracellular Space | transporter                |
| 4500  | 3.79E-02 | Map2          | MAP2          | major urinary protein 1                                                              | Extracellular Space | other                      |
| 4535  | 1.34E-04 | Hmgcs2        | HMGCS2        | 3-hydroxy-3-methylglutaryl-CoA synthase 2 (mitochondrial)                            | Cytoplasm           | enzyme                     |
| 5033  | 1.40E-03 | Cif2          | CIF2          | cifin 2 (muscle)                                                                     | Other               | other                      |
| 5087  | 4.04E-05 | Hspb1         | HSPB1         | heat shock 27kDa protein 1                                                           | Cytoplasm           | other                      |
| 5338  | 3.60E-05 | Pk3ap1        | PK3AP1        | phosphoinositide-3-kinase adaptor protein 1                                          | Cytoplasm           | other                      |
| 5361  | 6.81E-05 | Csta3         | CSTA3         | glutathione S-transferase alpha 3                                                    | Cytoplasm           | enzyme                     |
| 5406  | 3.53E-05 | Bex4          | BE4           | brain expressed, X-linked 4                                                          | Cytoplasm           | other                      |
| 5445  | 4.93E-03 | Sytn          | SYCN          | syncoilin                                                                            | Extracellular Space | other                      |
| 6319  | 1.83E-05 | Gcn1          | GCN1          | guanosaminyl (N-acetyl) transferase 1, core 2                                        | Extracellular Space | enzyme                     |
| 6444  | 4.42E-04 | Serpin1b      | SERPINA1      | serpin peptidase inhibitor, clade A (alpha-1 antitrypsinase, antitrypsin), member 1  | Extracellular Space | other                      |
| 6532  | 5.98E-04 | Serpin1b      | SERPINA1      | serpin peptidase inhibitor, clade A (alpha-1 antitrypsinase, antitrypsin), member 1  | Extracellular Space | other                      |
| 6893  | 1.45E-05 | Gcn1          | GCN1          | guanosaminyl (N-acetyl) transferase 1, core 2                                        | Cytoplasm           | enzyme                     |
| 7573  | 3.13E-02 | Serpin4       | SERPINA4      | SERP4 domain containing 4                                                            | Other               | other                      |
| 7756  | 2.40E-04 | Serpin1b      | SERPINA1      | serpin peptidase inhibitor, clade A (alpha-1 antitrypsinase, antitrypsin), member 1  | Extracellular Space | other                      |
| 7870  | 1.85E-04 | Serpin1b      | SERPINA1      | serpin peptidase inhibitor, clade A (alpha-1 antitrypsinase, antitrypsin), member 1  | Extracellular Space | other                      |
| 8121  | 2.21E-05 | Cubn          | CUBN          | cubilin (retinol) factor-cobalamin receptor                                          | Plasma Membrane     | transmembrane receptor     |
| 9371  | 6.31E-06 | Slc40a1       | SLC40A1       | solute carrier family 40 (iron-regulated transporter), member 1                      | Plasma Membrane     | transporter                |
| 12336 | 6.94E-06 | Deb37         | Deb37         | defensin beta 37                                                                     | Extracellular Space | other                      |

**Table S4.** Primers used for qPCR analysis of gene transcripts

|                                |                                      |
|--------------------------------|--------------------------------------|
| <b>Claudin-1</b>               |                                      |
| Up                             | 5'-GCCATCTACGAGGGACTGTGGA-3'         |
| Dw                             | 5'-TGCCAATTACCATCAAGGCTCGG-3'        |
| <b>Claudin-2</b>               |                                      |
| Up                             | 5'-GCCACCCACAGATACTTGTAAGGAG-3'      |
| Dw                             | 5'-TTCGGAGCCTGTTTGCTTGTCG-3'         |
| <b>Claudin-3</b>               |                                      |
| Up                             | 5'-CCTTGCTGTGTTGCTCCTGCC-3'          |
| Dw                             | 5'-CTCAGACGTAGTCCTTGCGGTC-3'         |
| <b>ZO-1 (TJP1)</b>             |                                      |
| Up                             | 5'-TGCAGAGACAATAGCATTCTCCAC-3'       |
| Dw                             | 5'-TAGCTCCACGGGCTTCAGGAAC-3'         |
| <b>Jam-1 (F11R)</b>            |                                      |
| Up                             | 5'-TGGATATGGGACAGCCATGAGGT-3'        |
| Dw                             | 5'-GCTATAGGCAAACCAGACGCCA-3'         |
| <b>Occludin</b>                |                                      |
| Up                             | 5'-GGAACACATTTATGATGAACAGCCCC-3'     |
| Dw                             | 5'-CGCTTGCCATTCACCTTGCCAT-3'         |
| <b>E-cadherin</b>              |                                      |
| Up                             | 5'-ACCAAAGTGACGCTGAAGTCCAT-3'        |
| Dw                             | 5'-GATGGGAGGGATGACCCAGTCT-3'         |
| <b>Icam1</b>                   |                                      |
| Up                             | 5'-CTGCTACCTGCACTTTGCCCTG-3'         |
| Dw                             | 5'-AGGCTTCTCTGGGATGGATGGAT-3'        |
| <b>Cx3cr1</b>                  |                                      |
| Up                             | 5'-GAGTATGACGATTCTGCTGAGG-3'         |
| Dw                             | 5'-CAGACCGAACGTGAAGACGAG-3'          |
| <b>Il-1<math>\beta</math></b>  |                                      |
| Up                             | 5'-TAGCCCGCACTGAGGTCTTT-3'           |
| Dw                             | 5'-AGCAATGTGCTGGTGCTTCA-3'           |
| <b>Cd5</b>                     |                                      |
| Up                             | 5'-CCCCACAGGAGTGAACCAGAACA-3'        |
| Dw                             | 5'-TGGATAAGCAGACAGGTGAGAGTTCC-3'     |
| <b>Cd69</b>                    |                                      |
| Up                             | 5'-ACTTCTTCTCCACCACAACCAAGAGT-3'     |
| Dw                             | 5'-GCCCAATCCAATGTTCCAGTTCACC-3'      |
| <b>Il-1<math>\beta</math>r</b> |                                      |
| Up                             | 5'-TCGCTATCCGTTTATCTGTGTTGTTAAGAA-3' |
| Dw                             | 5'-TGTAGCCGTGAGGATGATAAAGCCC-3'      |

**Il-23a**

Up 5'-CCCGTATCCAGTGTGAAGATGGTTGT-3'  
Dw 5'-TCCCCTTTGAAGATGTCAGAGTCAAGC-3'

**Ccl20**

Up 5'-GCCTCTCGTACATACAGACGC-3'  
Dw 5'-CCAGTTCTGCTTTGGATCAGC-3'

**Ccr6**

Up 5'-CCTGGGCAACATTATGGTGGT-3'  
Dw 5'-CAGAACGGTAGGGTGAGGACA-3'

**Cxcl1**

Up 5'-CTGGGATTCACCTCAAGAACATC-3'  
Dw 5'-CAGGGTCAAGGCAAGCCTC-3'

**Il-21**

Up 5'-GGACCCTTGTCTGTCTGGTAG-3'  
Dw 5'-TGTGGAGCTGATAGAAGTTCAGG-3'

**Ccr4**

Up 5'-TCCCCTCGTGCTCTGCA-3'  
Dw 5'-TGC GTGTAAGAGGAGCTGGAC-3'

**Cd25**

Up 5'-TTGTCTGGGCAGAACTGTGTCT-3'  
Dw 5'-GCTCCAGGAGTTTCCTAAGCAA-3'

**Cxcr4**

Up 5'-AGCATGACGGACAAGTACC-3'  
Dw 5'-GATGATATGGACAGCCTTACAC-3'

**Foxp3**

Up 5'-GGCCCTTCTCCAGGACAGA-3'  
Dw 5'-GCTGATCATGGCTGGGTTGT-3'

**Ifn- $\gamma$** 

Up 5'-CAGCAACAGCAAGGCGAAA-3'  
Dw 5'-GCTGGATTCCGGCAACAG-3'

**Il-10**

Up 5'-TTTGAATTCCCTGGGTGAGAAG-3'  
Dw 5'-TGCTCCACTGCCTTGCTCTT-3'

**Il-12p35**

Up 5'-CACGCTACCTCCTCTTTTTGG-3'  
Dw 5'-TTTTCTCTGGCCGTCTTCAC-3'

**Il-12p40**

Up 5'-GGTGCAAAGAAACATGGACTTG-3'  
Dw 5'-GACAGAGACGCCATTCCACAT-3'

**Il-13**

Up 5'-GTGTCTCTCCCTCTGACCCTTAA-3'  
Dw 5'-GAGATGTTGGTCAGGGAATCC-3'

**II-17**

Up 5'-TCCAGAAGGCCCTCAGACTAC-3'  
 Dw 5'-TGTGGTGGTCCAGCTTTCC-3'

**II-2**

Up 5'-CCCAGGATGCTCACCTTCAA-3'  
 Dw 5'-CCGCAGAGGTCCAAGTTCAT-3'

**II-23r**

Up 5'-GCCAAGAAGACCATTCCTCGA-3'  
 Dw 5'-TCAGTGCTACAATCTTCTTCAGAGGACA-3'

**II-24**

Up 5'-CTCCACTCTGGCCAACAACCTT-3'  
 Dw 5'-CACCAAAGCGACTTCTGTATCC-3'

**Tgf $\beta$** 

Up 5'-GGACCCTGCCCCCTATATTTG-3'  
 Dw 5'-GCTTGCGACCCACGTAGTAG-3'

**Tnf $\alpha$** 

Up 5'-AGGCGGTGCCTATGTCTCA-3'  
 Dw 5'-GGGTCTGGGCCATAGAAGTCTG-3'

**Table S5.** Primers used for qPCR analysis of ChIPs experiments**Site 1**

mClau2prom-331up1 5'-TGACATTTTGGCTCTACTTCCA-3'  
 mClau2prom-157dw1 5'-CAGGCTCAAGAAGGCATCTA-3'

**Site 2**

mClau2prom-1706up3 5'-ATTACCCAGGGATGTTGGT-3'  
 mClau2prom-1528dw3 5'-GGAGGGGGTTAGGATTTAGC-3'

**Site 3 (-1775 to -1762)**

mClau2prom-18186up5 5'-TGGTGGAAATGAGAAACACAA-3'  
 mClau2prom-1707dw5 5'-CCTTGACACCCTGTGCCTAT-3'

**Negative region**

mouseIL1 $\beta$ (-398)-FWD 5'-CCAAACTCCAAGTCAAAGC-3'  
 mouseIL1 $\beta$ (-197)-REV 5'-TGGTGGAAATGGGCATTATT-3'

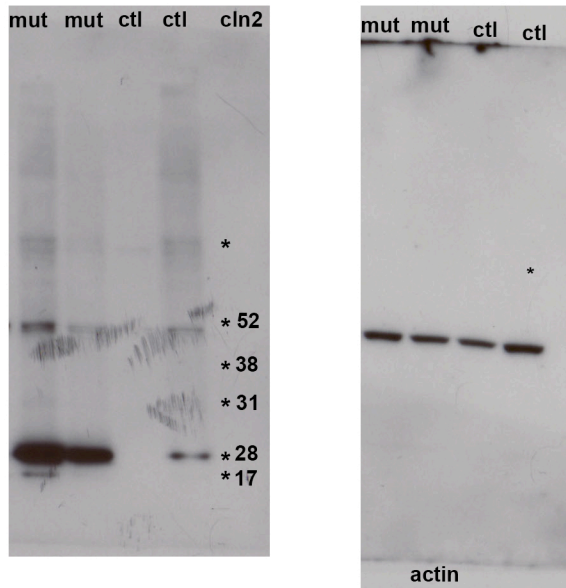

**Full length gels for claudin-2 and actin blots displayed in Figure 2b.**
